# Supplementary material
Source: PubMed Central journal article supplement (PMC5217247)
Supplement: NIHMS839116-supplement-supplement_1.pdf [file NIHMS839116-supplement-supplement_1.pdf]

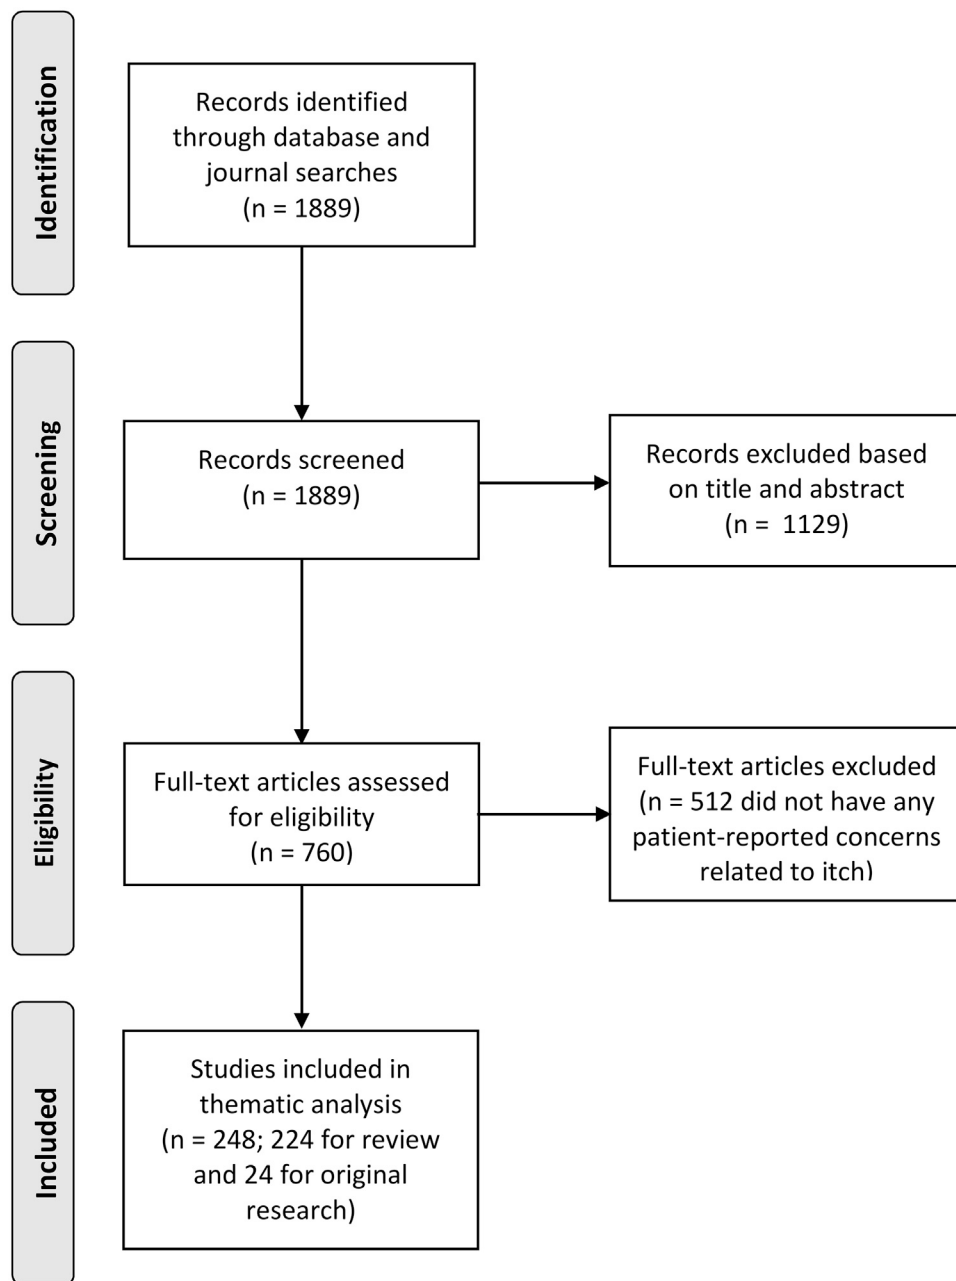

**Supplemental Fig 1.** Preferred Reporting Items for Systematic Reviews and Meta-Analyses (PRISMA) diagram.

**Supplemental Table I.** Patient-reported concerns about itch in original qualitative and mixed methods research studies

| Item                             | Frequency | Item                            | Frequency | Item                                 | Frequency |
|----------------------------------|-----------|---------------------------------|-----------|--------------------------------------|-----------|
| Total original references        | 366       | Relationship-social effects     | 41        | Acute                                | 1         |
| Emotional effects of itch        | 76        | Sleep impairment                | 35        | Chronic                              | 1         |
| Anxiety-worry                    | 14        | Physical manifestations of itch | 33        | Constant                             | 1         |
| Sadness-depression               | 12        | Scratching-rubbing              | 7         | Intermittent                         | 1         |
| Anger                            | 7         | Bleeding                        | 5         | Paroxysmal-episodic                  | 1         |
| Bothersome                       | 6         | Scars-scarring                  | 3         | Prolonged                            | 1         |
| Annoying                         | 4         | Inflamed-inflammation           | 3         | Treatment                            | 14        |
| Frustrating                      | 4         | Swelling                        | 3         | Difficult to manage-treat            | 2         |
| Irritability                     | 3         | Lesions                         | 2         | Emotional reaction to treatment      | 2         |
| Distressing                      | 3         | Irritated skin                  | 2         | Clothing stains                      | 1         |
| Mood affected                    | 3         | Xerosis                         | 1         | Intractable                          | 1         |
| Personality changes              | 2         | Ulcers-ulceration               | 1         | Uncontrollable                       | 1         |
| Agitation                        | 2         | Disfigurement                   | 1         | Financial                            | 1         |
| Burdensome                       | 2         | Redness                         | 1         | Side effects                         | 1         |
| Fear-frightful                   | 2         | Scaling                         | 1         | Treatment, other                     | 5         |
| Guilt                            | 2         | Sensitive skin                  | 1         | Fatigue                              | 10        |
| Aggressiveness                   | 1         | Wheals                          | 1         | Clothing choices affected            | 8         |
| Stress                           | 1         | Pruritus                        | 1         | Miscellaneous                        | 8         |
| Psychological-mental effects     | 1         | Exacerbating factors            | 21        | Sexual effects                       | 7         |
| Helplessness                     | 1         | Temperature-climate             | 6         | Concentration impairment             | 6         |
| Suffering                        | 1         | Heat-sweat                      | 4         | Food choices affected                | 6         |
| Upset                            | 1         | Dryness                         | 3         | Self-esteem/self-confidence affected | 5         |
| Crazy                            | 1         | Clothing                        | 2         | Moderate                             | 2         |
| Fretful                          | 1         | Chemotherapy                    | 1         | Pleasant-pleasurable                 | 2         |
| Emotional effects of itch, other | 2         | Food                            | 1         | Avoidance behavior increased         | 1         |
| Functional limitations           | 45        | Hot shower                      | 1         | Individuality constrained            | 1         |
| Work-school                      | 14        | Water                           | 1         | Insistent                            | 1         |
| Physical activities              | 7         | Stress                          | 1         | Irresistible                         | 1         |
| Nonphysical leisure activities   | 4         | Pain                            | 1         | Pervasive                            | 1         |
| Errands affected                 | 3         | Self-conscious/embarrassed      | 20        | Pointed                              | 1         |
| Playing                          | 2         | Timing                          | 18        | Sore                                 | 1         |
| Going out                        | 2         | Nocturnal-nocturnal worsening   | 3         | Stubborn                             | 1         |
| Exercise                         | 1         | Persistent-unabating            | 3         | Appetite effects                     | 1         |
| Housework                        | 1         | Frequent                        | 2         |                                      |           |
| Bathing routine affected         | 1         | Recurrent                       | 2         |                                      |           |
| Functional limitations, other    | 10        | Common                          | 2         |                                      |           |

**Supplemental Table II.** Patient concerns related to itch presented in review articles

| Item                            | Frequency | Item                         | Frequency | Item                                | Frequency |
|---------------------------------|-----------|------------------------------|-----------|-------------------------------------|-----------|
| Total review references         | 1669      | Prurigo nodularis            | 13        | Self-blame                          | 1         |
| Physical manifestations of itch | 569       | Purulence                    | 1         | Shame                               | 5         |
| Abrasions                       | 2         | Pustules                     | 6         | Stress                              | 8         |
| Acanthosis                      | 3         | Rash                         | 13        | Suffering                           | 3         |
| Atrophy                         | 2         | Raw                          | 2         | Suicidal                            | 6         |
| Bleeding                        | 6         | Red                          | 3         | Troublesome                         | 6         |
| Blisters                        | 4         | Redness                      | 1         | Troubling                           | 1         |
| Bumps                           | 1         | Rough skin                   | 1         | Unbearable                          | 2         |
| Cracking-fissuring              | 4         | Scale-scaling-scaly          | 21        | Upset                               | 1         |
| Crust                           | 19        | Scars-scarring               | 9         | Vexing                              | 1         |
| Depigmentation                  | 1         | Scratch marks                | 3         | Worrisome                           | 1         |
| Dermatitis                      | 4         | Scratching-rubbing           | 13        | Emotional effects of itch,<br>other | 17        |
| Dermatosis                      | 4         | Sensitive skin               | 5         | Exacerbating factors                | 156       |
| Desquamation                    | 7         | Swelling                     | 3         | Alcohol                             | 3         |
| Discharge                       | 1         | Targetoid                    | 1         | Allergens-irritants                 | 25        |
| Disfigurement                   | 3         | Thickening                   | 6         | Chemicals                           | 1         |
| Draining                        | 1         | Turgor                       | 1         | Clothing                            | 16        |
| Dry                             | 29        | Ulcers-ulceration            | 2         | Disinfectants                       | 2         |
| Eczematous                      | 3         | Urticaria-urticarial         | 5         | Dryness                             | 3         |
| Edema                           | 11        | Vesicles                     | 7         | Exercise                            | 2         |
| Erosions                        | 6         | Weepy-weeping                | 5         | Food                                | 5         |
| Eruption                        | 14        | Wheals                       | 3         | Heat-sweat                          | 30        |
| Erythema                        | 40        | Xerosis                      | 23        | Hot water                           | 2         |
| Erythroderma                    | 1         | Emotional effects of itch    | 247       | Soap-detergent                      | 14        |
| Exanthem                        | 2         | Agitation                    | 4         | Stress                              | 16        |
| Excoriations                    | 35        | Agonizing                    | 1         | Sun                                 | 2         |
| Exfoliation                     | 1         | Anger                        | 5         | Temperature-climate                 | 16        |
| Exudation                       | 2         | Annoying                     | 7         | Touch                               | 1         |
| Fissure                         | 3         | Anxiety-worry                | 25        | Water contact                       | 18        |
| Follicular                      | 2         | Bothersome                   | 10        | Timing                              | 144       |
| Folliculitis                    | 1         | Burdensome                   | 3         | Acute                               | 6         |
| Hives                           | 1         | Concerning                   | 1         | Bouts                               | 1         |
| Hyperkeratosis                  | 4         | Difficulty coping            | 1         | Chronic                             | 31        |
| Hyperplasia                     | 1         | Distressing                  | 27        | Common                              | 15        |
| Induration                      | 1         | Fear                         | 1         | Constant                            | 3         |
| Infection                       | 24        | Frustrating                  | 6         | Continuous                          | 3         |
| Infiltration                    | 1         | Guilt                        | 3         | Cyclic                              | 1         |
| Inflamed-inflammation           | 28        | Helplessness                 | 2         | Daily                               | 2         |
| Inflammatory                    | 3         | Hostility                    | 2         | Daytime                             | 1         |
| Leathery                        | 2         | Irritability                 | 4         | Develops in minutes                 | 2         |
| Lesions                         | 23        | Irritating                   | 3         | Exacerbations                       | 3         |
| Lichenification                 | 37        | Mood affected                | 9         | Frequent                            | 5         |
| Macular                         | 1         | Nervous                      | 1         | Insidious onset                     | 1         |
| Necrosis                        | 1         | Paranoia                     | 1         | Intermittent                        | 10        |
| Nodules                         | 14        | Personality changes          | 1         | Mealtime                            | 1         |
| Nummular                        | 1         | Psychological-mental effects | 25        | Nocturnal-nocturnal<br>worsening    | 8         |
| Oozing                          | 6         | Psychosocial effects         | 8         | Occasionally                        | 1         |
| Papules                         | 28        | Reduced optimism             | 1         | Paroxysmal-episodic                 | 4         |
| Patches                         | 3         | Resent                       | 2         | Persistent-unabating                | 17        |
| Pigmentation changes            | 20        | Resignation                  | 1         | Progressive                         | 2         |
| Plaques                         | 11        | Sadness-depression           | 41        | Prolonged                           | 5         |

Continued

**Supplemental Table II.** Cont'd

| Item                           | Frequency | Item                            | Frequency | Item                                 | Frequency |
|--------------------------------|-----------|---------------------------------|-----------|--------------------------------------|-----------|
| Recurrent                      | 4         | Difficult to manage-treat       | 2         | Self-esteem/self-confidence affected | 3         |
| Relapsing                      | 7         | Difficult to relieve            | 3         | Bathing routine affected             | 2         |
| Remitting                      | 4         | Emotional reaction to treatment | 1         | Moderate                             | 2         |
| Spontaneous                    | 1         | Intractable                     | 9         | Provoked                             | 2         |
| Stable                         | 1         | Refractory-unresponsive         | 11        | Weight loss                          | 2         |
| Sudden onset                   | 1         | Side effects                    | 3         | Catastrophizing                      | 1         |
| Transient-short                | 2         | Time-consuming                  | 2         | Food choices affected                | 1         |
| Unrelenting                    | 1         | Fatigue                         | 32        | Gouging                              | 1         |
| Variable duration              | 1         | Sexual effects                  | 23        | Intrusive                            | 1         |
| Sleep impairment               | 127       | Self-conscious-embarrassed      | 24        | Limited                              | 1         |
| Functional limitations         | 102       | Irritation-irritated            | 20        | Morbidity                            | 1         |
| Debilitating                   | 4         | Concentration impairment        | 14        | Prevalent                            | 1         |
| Dexterity                      | 1         | Skin barrier function altered   | 10        | Problematic                          | 1         |
| Disabling                      | 11        | Appetite effects                | 8         | Prominent                            | 1         |
| Impairing                      | 1         | Inconvenience                   | 6         | Reactive skin                        | 1         |
| Incapacitating                 | 2         | Time-consuming                  | 2         | Self-limited                         | 1         |
| Nonphysical leisure activities | 6         | Inconvenience, other            | 4         | Sensitivity increased                | 1         |
| Physical activities            | 11        | Growth-development affected     | 5         | Sepsis                               | 1         |
| Work-school                    | 37        | Physical well-being affected    | 4         | Strong                               | 1         |
| Functional limitations, other  | 29        | Avoidance behavior increased    | 3         | Tumor                                | 1         |
| Miscellaneous                  | 63        | Behavioral changes              | 3         | Unrecognized                         | 1         |
| Relationship-social effects    | 44        | Clothing choices affected       | 3         | Weak                                 | 1         |
| Treatment                      | 31        | Restlessness                    | 3         |                                      |           |
